# Supplementary material
Source: Springer Nature journal article supplement (https://www.springermedizin.de/resource/supplementary/13014_2009_200_MOESM3_ESM.pdf/9633120)

SAS/neo

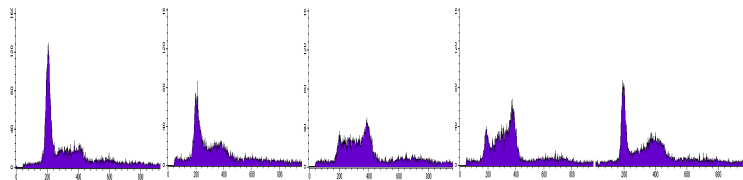

SAS/mp53

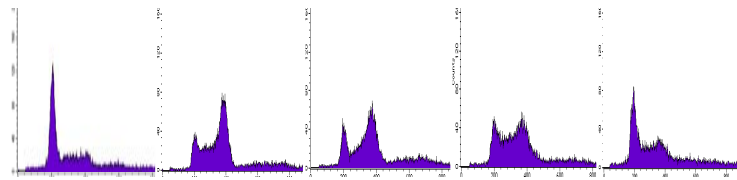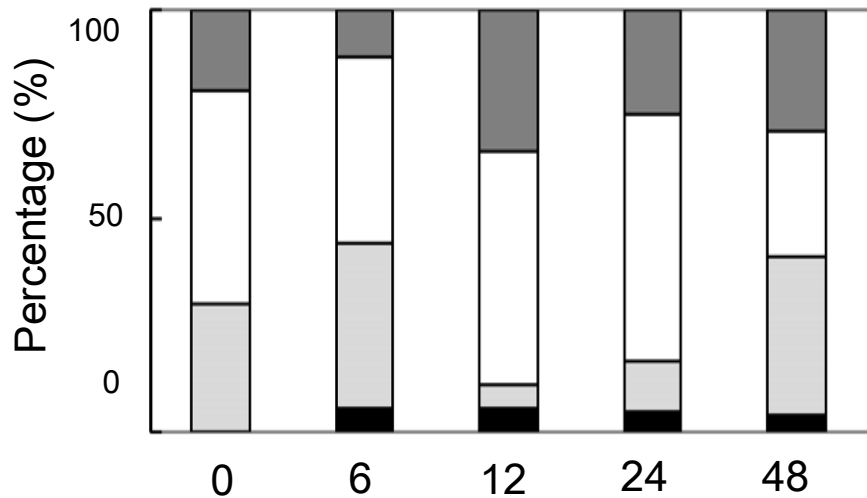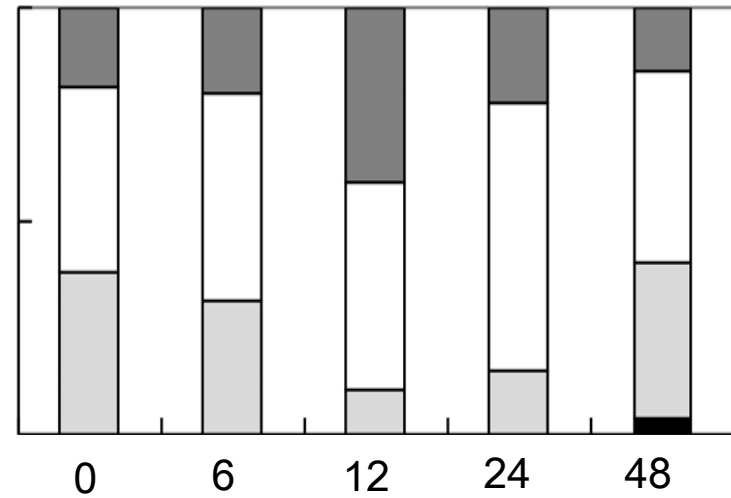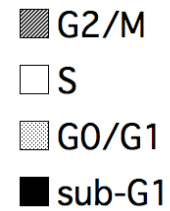

Time after BNCT (hours)

Supplement: MOESM3 [file 9633120]
